# Supplementary material
Source: publisher site journal article supplement (https://www.dovepress.com/get_supplementary_file.php?f=288982.docx)
Supplement: Supplementary file 1 [file get_supplementary_file.php]

**Supplemental** **table** Immunoscore system

| **Immune infiltration** | **Tumor interior** | **Invasive margin** | **Total** |
| --- | --- | --- | --- |
| **CD3 score** | 0 or 1 | 0 or 1 | 0,1 or 2 |
| **CD8 score** | 0 or 1 | 0 or 1 | 0,1 or 2 |
| **Total Immunoscore** | | | 0,1,2,3 or 4 |
